# Supplementary material
Source: PubMed Central journal article supplement (PMC11309804)
Supplement: NIHMS2004070-supplement-Suppl_Material.pdf [file NIHMS2004070-supplement-Suppl_Material.pdf]

# A subpopulation of lipogenic brown adipocytes drives thermogenic memory

---

In the format provided by the authors and unedited

---

**Supplementary Table 1. Primers for qPCR analysis.**

| <b>Gene</b> | <b>Forward Primer</b>  | <b>Reverse Primer</b> |
|-------------|------------------------|-----------------------|
| <i>Ucp1</i> | TCAGGATTGGCCTCTACGAC   | TGCCACACCTCCAGTCATTA  |
| <i>Fasn</i> | AAGTTTCGACGCCTCCTTTTT  | TCTCGGGATCTCTGCTAAGG  |
| <i>Scd1</i> | GCCCCTACGACAAGAACATT   | CATGCAGTCGATGAAGAACG  |
| <i>Cact</i> | CTCGTTCAGGATGTGGTTTTTC | CTTCCCTTGGAGTATCTGGTG |
| <i>Lcad</i> | GGTGGAAAACGGAATGAAAGG  | GGCAATCGGACATCTTCAAAG |
| <i>Mcad</i> | TGTTAATCGGTGAAGGAGCAG  | CTATCCAGGGCATACTTCGTG |
| <i>36B4</i> | TCATCCAGCAGGTGTTTGACA  | GGCACCGAGGCAACAGTT    |
